# Supplementary material
Source: PubMed Central journal article supplement (PMC5571357)
Supplement: AAC.00661-17_zac009176486s1.pdf [file AAC.00661-17_zac009176486s1.pdf]

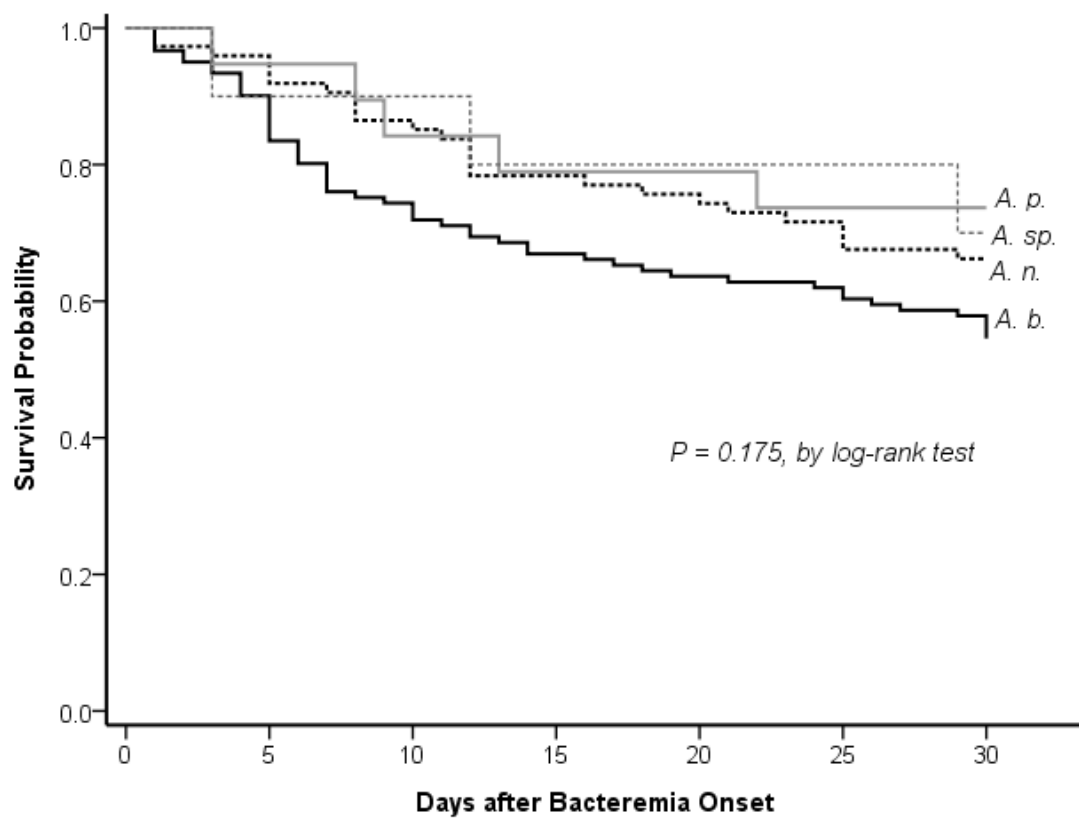

**FIG S1** Comparison of Kaplan–Meier survival curves, at 30 days, between patients with bacteremia caused by either *Acinetobacter baumannii* (*A. b.*), *Acinetobacter nosocomialis* (*A. n.*), *Acinetobacter pittii* (*A. p.*), or other *Acinetobacter* spp. (*A. sp.*)

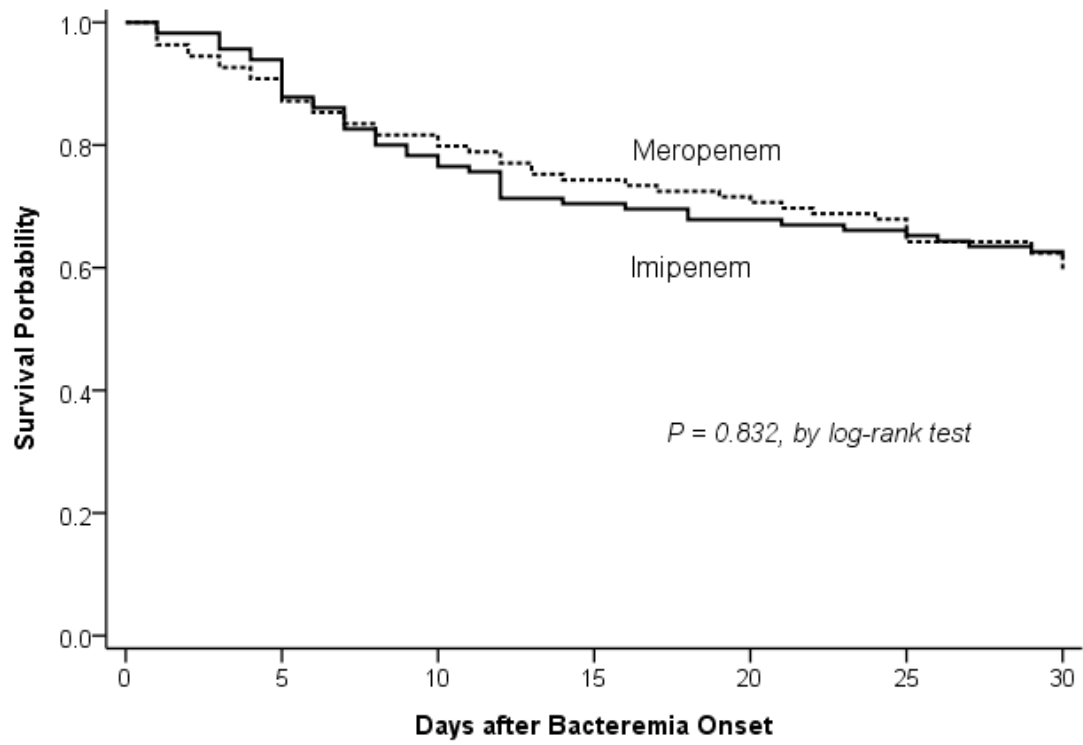

**FIG S2** Comparison of Kaplan–Meier survival curves, at 30 days, between patients treated with either imipenem or meropenem for their *Acinetobacter* bacteremia.

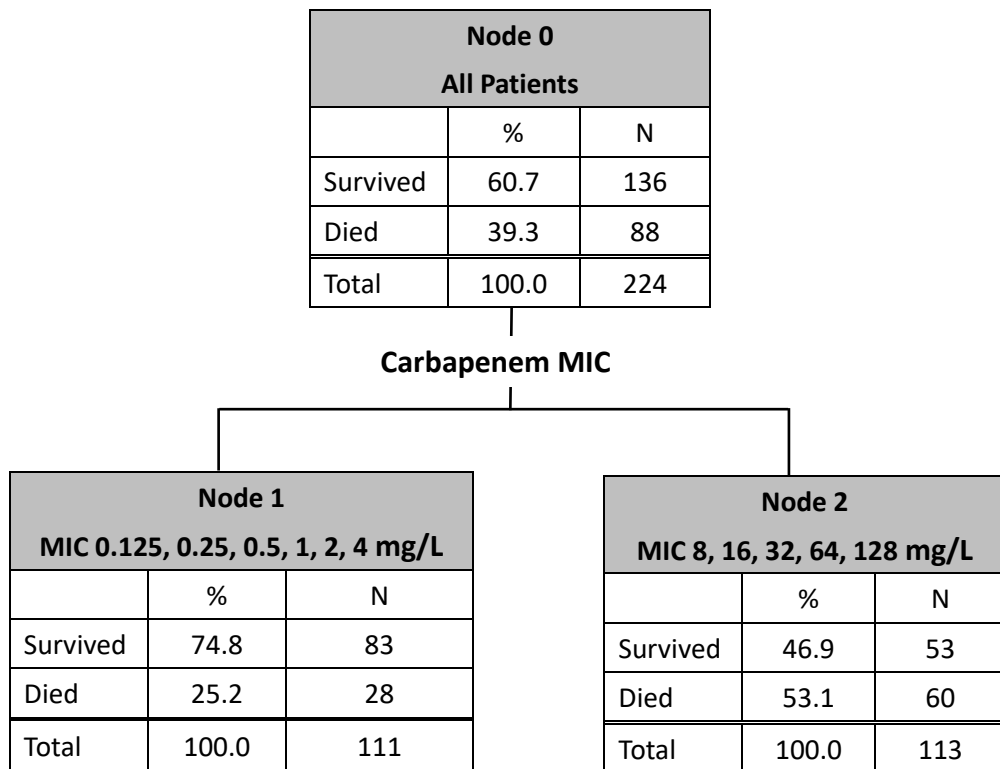

***P* < .001**

**FIG S3** Classification and Regression Tree (CART) analysis determined a split of carbapenem minimal inhibitory concentration (MIC) between 4 and 8 mg/L and predicted differences in mortality.

**TABLE S1** Clinical information of patients with *Acinetobacter* bacteremia who received alternative antimicrobial therapy after initial carbapenem monotherapy

| Antimicrobial therapy switched to             | Patients,<br>No. | APACHE II score at bacteremia<br>onset | 30-day Non-<br>survivors |
|-----------------------------------------------|------------------|----------------------------------------|--------------------------|
| Ampicillin/sulbactam                          | 1                | 20                                     | 0                        |
| Cefepime                                      | 1                | 30                                     | 1                        |
| Cefepime + sulbactam                          | 4                | 9,24,32,34                             | 2                        |
| Ceftazidime                                   | 2                | 13,19                                  | 2                        |
| Ciprofloxacin                                 | 3                | 26,29,30                               | 1                        |
| Ciprofloxacin + ampicillin/sulbactam          | 1                | 40                                     | 1                        |
| Colistin                                      | 9                | 8,13,18,21,24,28,29,36,38              | 3                        |
| Gemifloxacin                                  | 1                | 27                                     | 0                        |
| Imipenem + ciprofloxacin                      | 1                | 9                                      | 0                        |
| Imipenem + colistin                           | 1                | 23                                     | 0                        |
| Imipenem +colistin + sulbactam                | 1                | 28                                     | 1                        |
| Imipenem +sulbactam                           | 6                | 16,17,26,26,31,40                      | 3                        |
| Imipenem + tigecycline                        | 6                | 10,15,16,27,30,39                      | 2                        |
| Imipenem + colistin then colistin + sulbactam | 1                | 29                                     | 1                        |
| Meropenem + ciprofloxacin                     | 1                | 21                                     | 0                        |
| Meropenem + colistin                          | 11               | 13,13,22,23,25,26,28,33,36,36,42       | 5                        |
| Meropenem + sulbactam                         | 5                | 26,30,34,37,39                         | 3                        |
| Meropenem + tigecycline                       | 4                | 18,28,29,30                            | 3                        |

|                             |   |       |   |
|-----------------------------|---|-------|---|
| Piperacillin/tazobactam     | 2 | 20,22 | 0 |
| Tigecycline                 | 2 | 12,27 | 0 |
| Tigecycline + ciprofloxacin | 1 | 33    | 1 |
| Tigecycline + colistin      | 2 | 17,21 | 0 |

---
